# Supplementary material for: Beta-subunit-eliminated eHAP expression (BeHAPe) cells reveal subunit regulation of the cardiac voltage-gated sodium channel
Source: PubMed Central journal article supplement (PMC10506104; doi:10.1016/j.jbc.2023.105132), 2023-08-06
Supplement: mmc3.pdf [file mmc3.pdf]

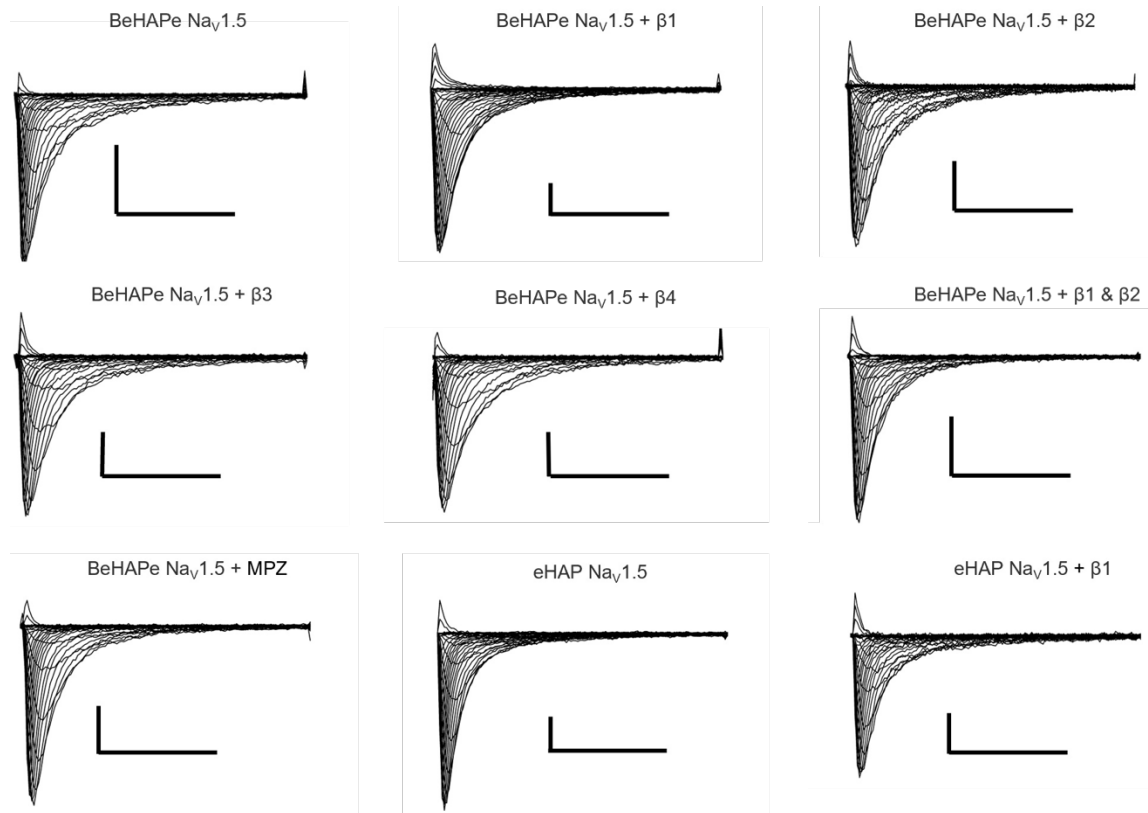

**Supplemental Figure 1.**

Representative trace families of each experimental condition. All scale bars are 1nA and 10ms.
